# Supplementary material for: Reorientation of the first signal-anchor sequence during potassium channel biogenesis at the Sec61 complex
Source: PubMed Central journal article supplement (PMC3898203; doi:10.1042/bj20130100), 2013-11-08
Supplement: bj4560297add.pdf [file bj4560297add.pdf]

**SUPPLEMENTARY ONLINE DATA****Reorientation of the first signal-anchor sequence during potassium channel biogenesis at the Sec61 complex**Helen R. WATSON\*<sup>1</sup>, Lydia WUNDERLEY\*, Tereza ANDREOU\*, Jim WARWICKER\* and Stephen HIGH\*<sup>2</sup>

\*Faculty of Life Sciences, University of Manchester, Michael Smith Building, Oxford Road, Manchester M13 9PT, U.K.

**EXPERIMENTAL****Immunofluorescence microscopy**

HeLaM cells grown on glass coverslips were transfected with plasmids encoding OPG–TASK75, OPG–TASK158 or the full-length version of the protein, using Lipofectamine™ 2000 in accordance with the manufacturer's instructions. Cells were fixed and permeabilized in  $-20^{\circ}\text{C}$  methanol for 5 min. Anti-opsin antibody was used to label OPG–TASK polypeptides, and anti-calnexin antibody (Sigma) was used as a marker for the endoplasmic reticulum. Alexa Fluor® 488- and 594-conjugated secondary antibodies were purchased from Jackson ImmunoResearch and DNA was stained using DAPI. Coverslips were mounted using Prolong Gold (Life Technologies) and fluorescence was visualized using a widefield Olympus BX-60 microscope with a  $\times 60$  1.40 N.A. (numerical aperture) PlanApo objective and a CoolSnap ES camera (Roper Scientific), with images captured using MetaVue software.

<sup>1</sup> Present address: University of Exeter Medical School, St. Lukes Campus, Magdalen Road, Exeter, Devon EX1 2LU, U.K.<sup>2</sup> To whom correspondence should be addressed (email [stephen.high@manchester.ac.uk](mailto:stephen.high@manchester.ac.uk)).

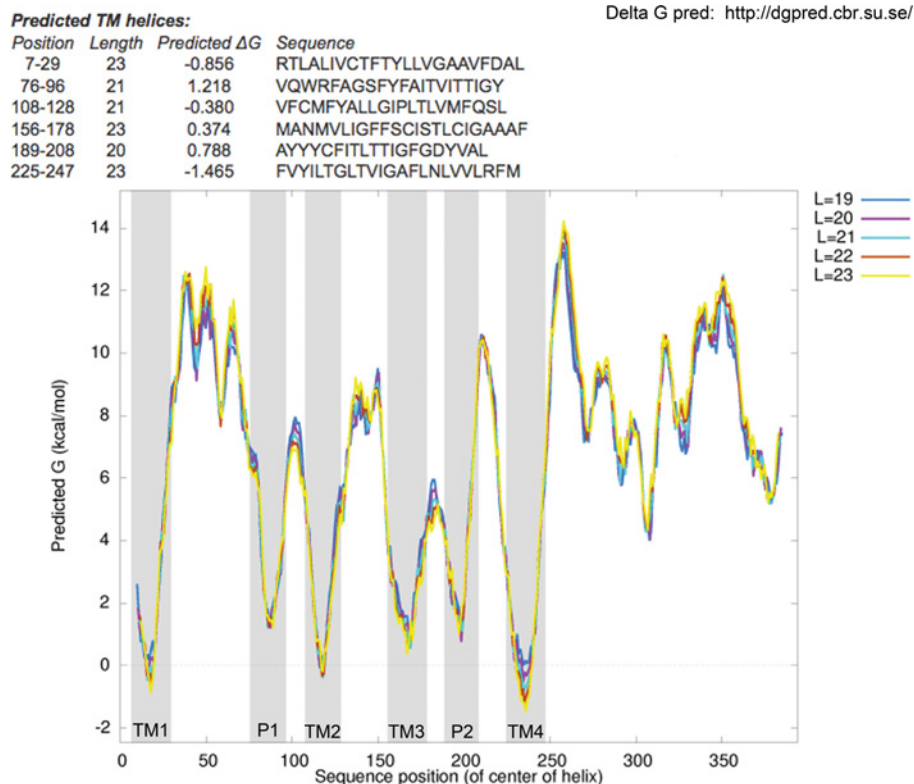

**Figure S1 Transmembrane domain prediction of TASK-1**

The human TASK-1 protein sequence was entered into the  $\Delta G$  prediction server version 1.0 online at <http://dgpred.cbr.su.se/>. This predicted not only the four transmembrane domains (TM1–TM4), but also predicted the pore loops P1 and P2 as transmembrane domains. 1 kcal = 4.184 kJ.

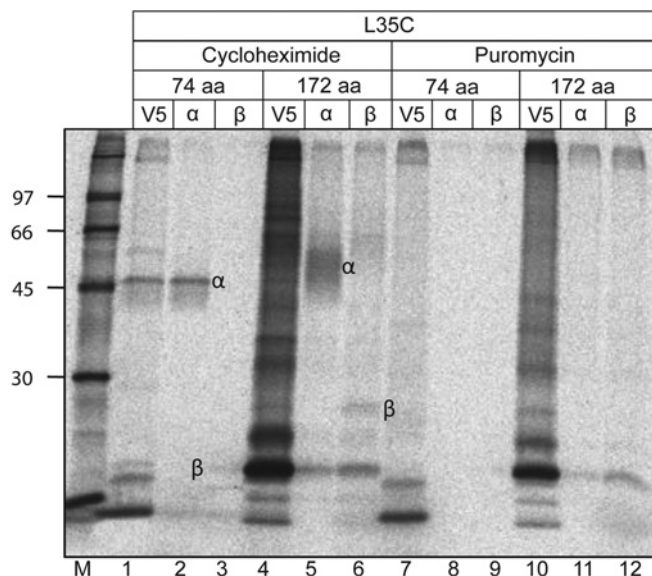

**Figure S2 Cross-linking following puromycin release**

TASK-1 truncations E60 and N158 lacking stop codons, both with the single cysteine mutation L35C and V5 tag were translated *in vitro*. Samples were then treated with either cycloheximide (as in all cross-linking in the present study) or puromycin (to release the nascent chain and dissociate the ribosome). BMH cross-linking was then carried out, and samples were subjected to immunoprecipitation with antibodies against the V5 tag (V5), Sec61 $\alpha$  ( $\alpha$ ) or Sec61 $\beta$  ( $\beta$ ). Adducts with Sec61 $\alpha$  and Sec61 $\beta$  are indicated. Molecular masses are indicated in kDa.

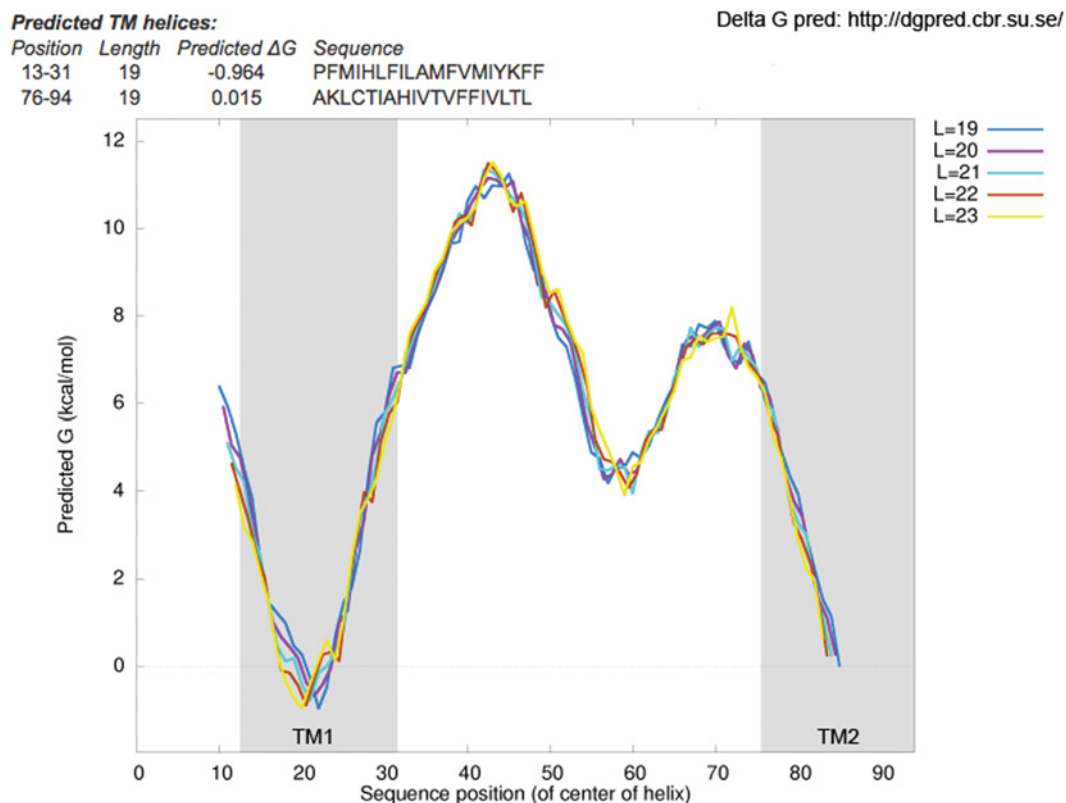

**Figure S3 Transmembrane domain prediction of Kcv**

The  $\Delta G$  prediction server version 1.0 (online at <http://dgpred.cbr.su.se/>) was used to predict the location of the two transmembrane domains in Kcv. 1 kcal = 4.184 kJ.

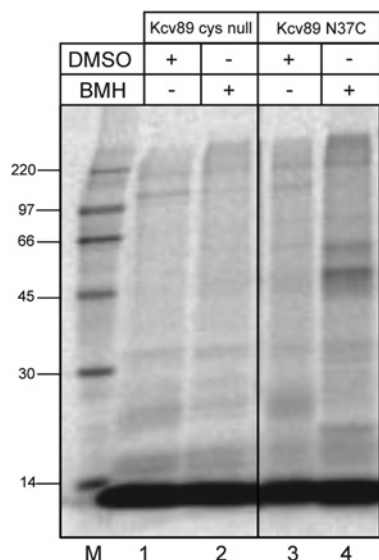

**Figure S4 Cysteine-dependent adducts with Kcv membrane integration intermediates**

The N-terminal 75 residues of a Cys-null form of Kcv (lanes 1 and 2), or a version with a single cysteine probe located at residue 37 (N37C, lanes 3 and 4), were synthesized using truncated mRNAs that incorporated a 14-residue V5 epitope tag at their C-termini, but lacked a stop codon. The resulting ribosome-bound peptidyl-tRNAs generated membrane-integration intermediates in the presence of ER-derived microsomes and, following isolation, these were treated with DMSO (lanes 1 and 3) or BMH (lanes 2 and 4) as indicated. A number of discrete BMH-dependent cross-linking products were observed with the N37C, but not the Cys-null variant (lane 4, filled circles). Molecular masses are indicated in kDa.

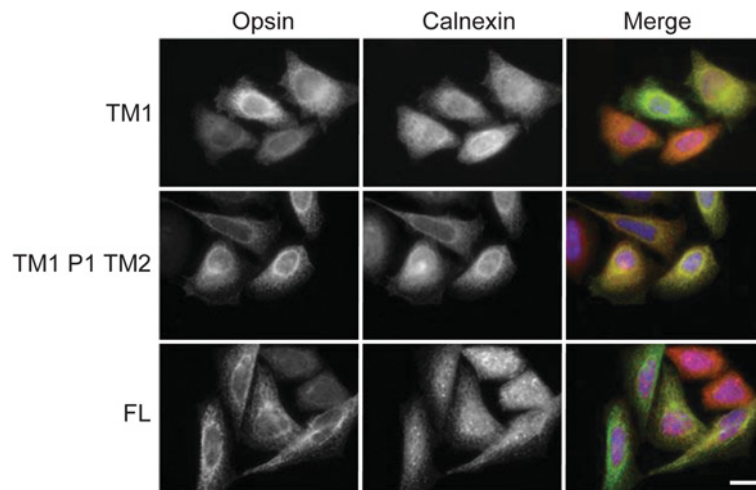

**Figure S5 TASK-1-derived products localize to the ER**

(A) HeLaM cells transiently expressing OPG-tagged fragments or full-length (FL) TASK-1 were methanol-fixed cells and stained with antibodies against the OPG tag and calnexin. Scale bars, 20  $\mu$ m.

Received 17 January 2013/9 August 2013; accepted 10 September 2013  
Published as BJ Immediate Publication 10 September 2013, doi:10.1042/BJ20130100
